# Issues and Events

## ADA Events

71st Scientific Sessions  
24–28 June 2011  
San Diego Convention Center  
San Diego, California  
Web site: <http://scientificsessions.diabetes.org>

Endocrinology Seminar  
22 September 2011  
Cromwell, Connecticut  
Contact: Louise Butcher  
E-mail: [lbutcher@diabetes.org](mailto:lbutcher@diabetes.org)

Annual Diabetes Practice Update  
30 September 2011  
Oregon Convention Center  
Portland, Oregon  
Contact: Bev Bromfield  
E-mail: [bbromfield@diabetes.org](mailto:bbromfield@diabetes.org)  
Web site: <http://professional.diabetes.org/adpu>

Iowa Diabetes Program  
7 October 2011  
Cedar Rapids, Iowa  
Contact: Sheryl Rolfe  
E-mail: [srolfe@diabetes.org](mailto:srolfe@diabetes.org)

9th Professional Symposium on Diabetes  
5 November 2011  
Honolulu, Hawaii  
E-mail: [lduenas@diabetes.org](mailto:lduenas@diabetes.org)

37th Annual Diabetes Symposium  
5 November 2011  
Wichita, Kansas  
E-mail: [ptasker@diabetes.org](mailto:ptasker@diabetes.org)

Annual Symposium on Diabetes for Healthcare Professionals  
16 November 2011  
Cromwell, Connecticut  
Contact: Louise Butcher  
E-mail: [lbutcher@diabetes.org](mailto:lbutcher@diabetes.org)

59th Annual Advanced Postgraduate Course  
17–19 February 2012  
Hyatt Regency San Francisco  
San Francisco, California

72nd Scientific Sessions  
8–12 June 2012  
Pennsylvania Convention Center  
Philadelphia, Pennsylvania  
Web site: <http://scientificsessions.diabetes.org>

Contact for information on ADA events: American Diabetes Association, 1701 N. Beauregard St., Alexandria, VA 22311.  
Tel: 800-232-3472, select option 1. Fax: 703-549-1715 or 703-253-4358. E-mail: [professionaleducation@diabetes.org](mailto:professionaleducation@diabetes.org).  
Web site: [www.diabetes.org/pro](http://www.diabetes.org/pro).

## Other Events

IDOF 2011  
10–12 November 2011  
Istanbul Convention and Exhibition Centre  
Istanbul, Turkey  
Web site: [www.idof2011.com](http://www.idof2011.com)

### Notice Regarding the Abstract Book of the American Diabetes Association's 71st Scientific Sessions

Due to rising postage and manufacturing costs, the upcoming Abstract Book of the American Diabetes Association's Scientific Sessions will no longer be mailed with the June issue of *Diabetes*.

Instead, effective 24 June 2011, the book will be freely available in PDF form on *Diabetes* online (<http://diabetes.org/diabetes>). Individual abstracts from the Abstract Book will continue to be indexed and searchable on DiabetesPro (<http://scientificsessions.diabetes.org/abstracts>).

Print versions of the Abstract Book will be distributed on-site to attendees of the 71st Scientific Sessions in San Diego, California, 24–28 June 2011.

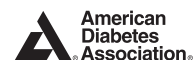

Source: https://ada.silverchair.com/care/article-pdf/34/6/1443/609264/1443.pdf
